# Supplementary material for: Reduced graphene oxide modified highly ordered TiO2 nanotube arrays photoelectrode with enhanced photoelectrocatalytic performance under visible-light irradiation
Source: Royal Society of Chemistry journal article supplement (doi:10.1039/c4cp01401d), 2014-01-01
Supplement: c4cp01401d1.pdf [file c4cp01401d1.pdf]

## Electronic Supplementary Information

### Reduced graphene oxide modified highly ordered TiO<sub>2</sub> nanotube array photoelectrode with enhanced photoelectrocatalytic performance under visible- light irradiation

Chunyang Zhai,<sup>a</sup> Mingshan Zhu,<sup>\*a,b</sup> Yongtao Lu,<sup>a</sup> Fangfang Ren,<sup>a</sup> Caiqin Wang,<sup>a</sup> Yukou Du,<sup>\*a</sup> and

Ping Yang<sup>a</sup>

<sup>a</sup> College of Chemistry, Chemical Engineering and Materials Science, Soochow University, Suzhou 215123, P. R. China. E-mail: [duyk@suda.edu.cn](mailto:duyk@suda.edu.cn) (Y. D.)

<sup>b</sup> Institute of Chemistry, Chinese Academy of Sciences, Beijing 100190, P. R. China. E-mail: [mingshanzhu@yahoo.com](mailto:mingshanzhu@yahoo.com) (M. Z.)

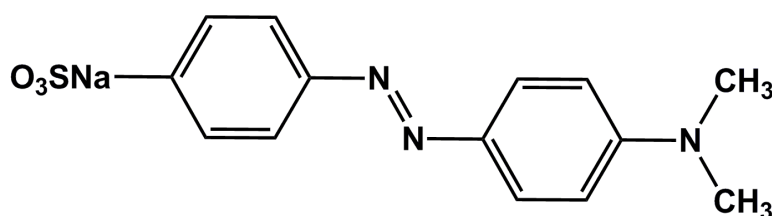

Figure S1. Chemical structure of MO molecule.

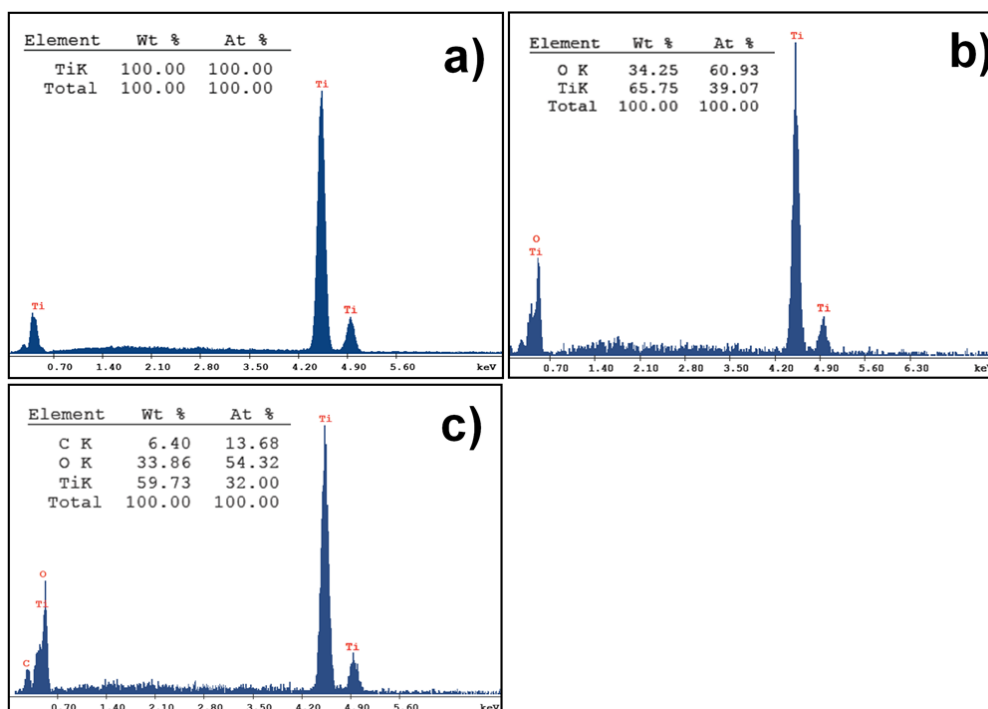

Fig. S2 EDX spectra of the metallic Ti substrate (a), bare TNTs (b) and RGO-TNTs (c) nanostructures.

The quantitative elemental analysis results for the above samples are also listed.

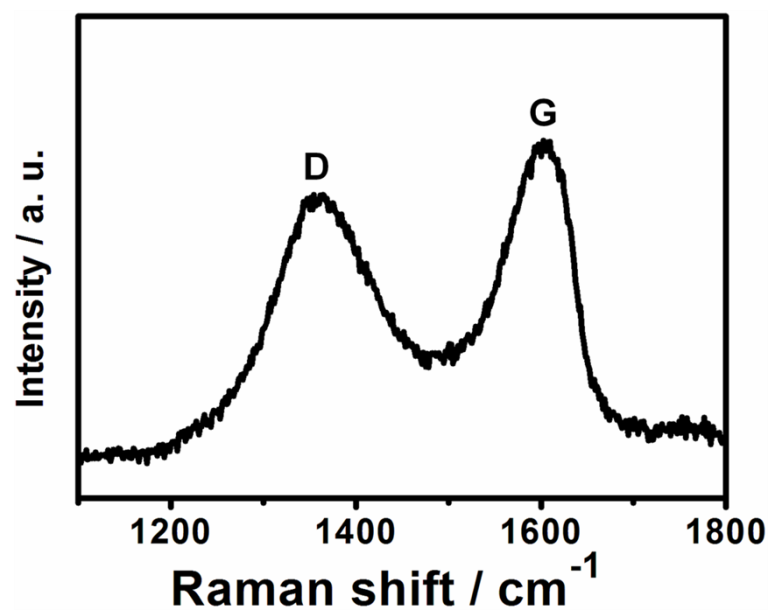

Fig. S3 Raman spectrum of GO nanosheets.

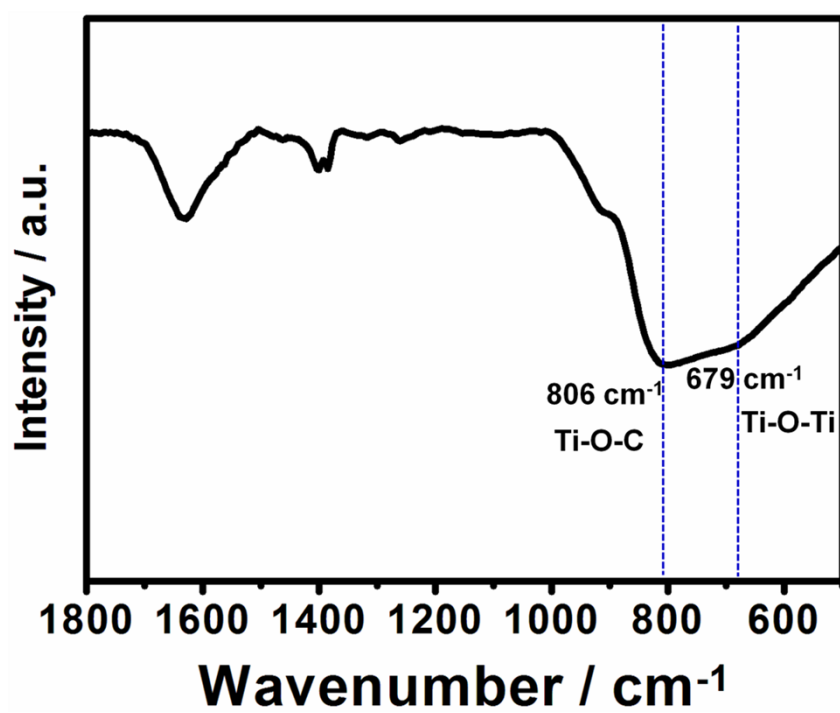

Fig. S4 FT-IR spectrum of RGO-TNTs nanostructures.

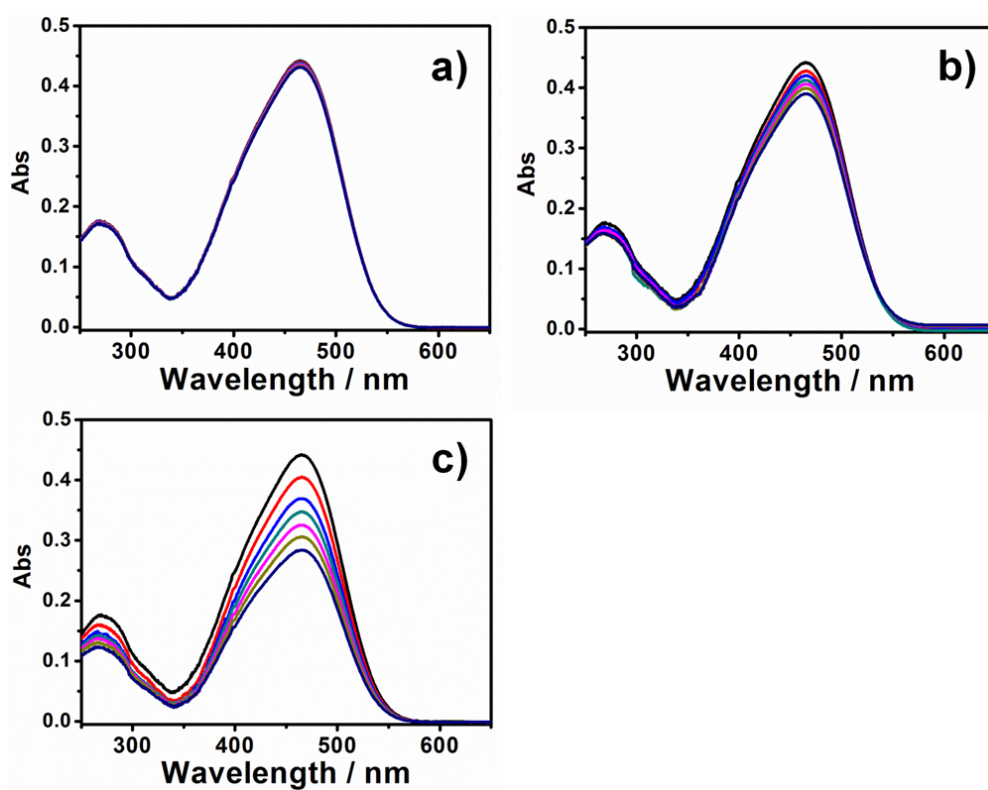

**Fig. S5** The real-time absorption spectra of MO molecules during the PEC degradation process over no catalysts (a), bare TNTs (b) and RGO-TNTs (c) electrode under visible-light illumination from 0 min to 120 min.

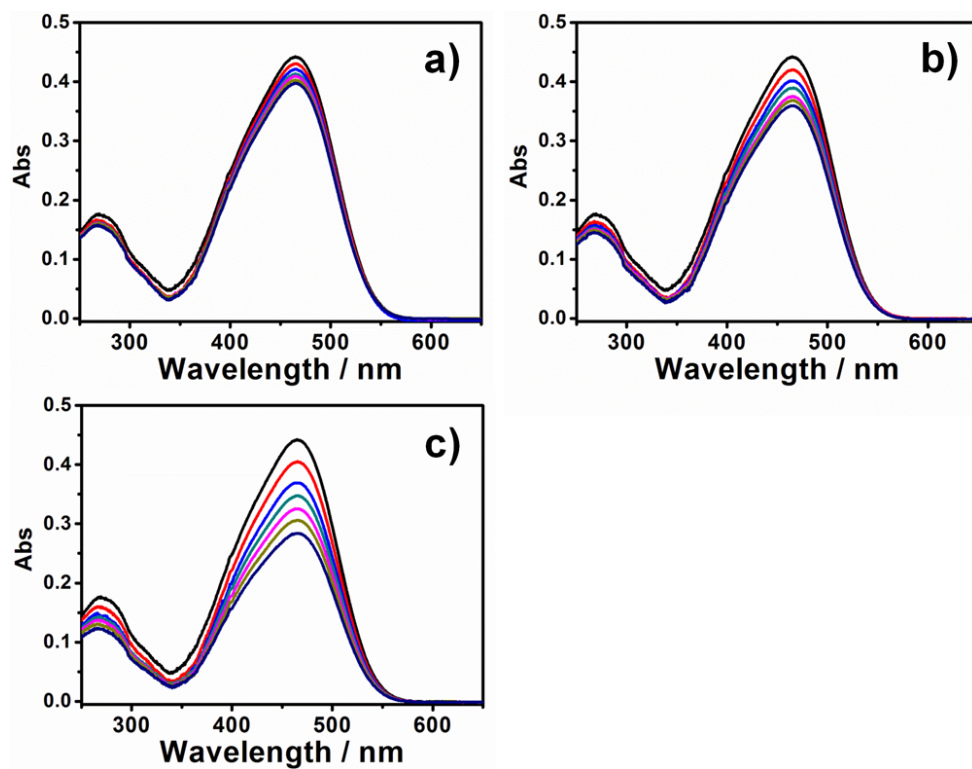

**Fig. S6** The real-time absorption spectra of MO molecules during the degradation process over RGO-TNTs electrode under different processes, (a) EC process, (b) PC process and (c) PEC process from 0 min to 120 min.

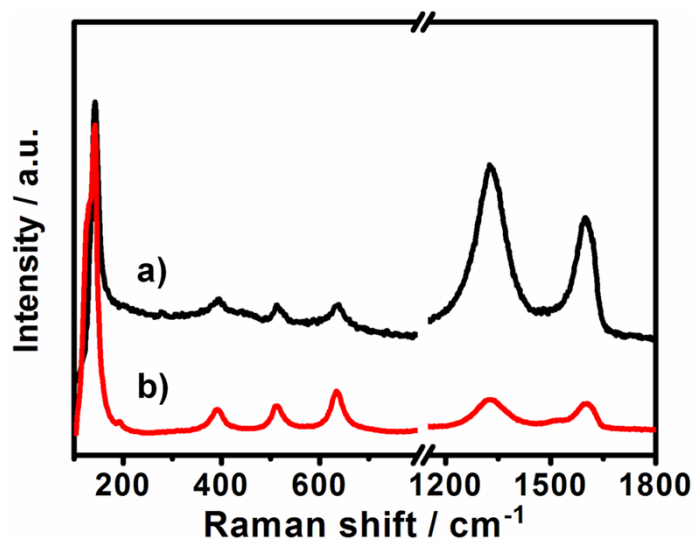

**Fig. S7** Raman spectra of RGO-TNTs electrode before (a) and after (b) the PEC degradation of MO dye under visible-light irradiation.

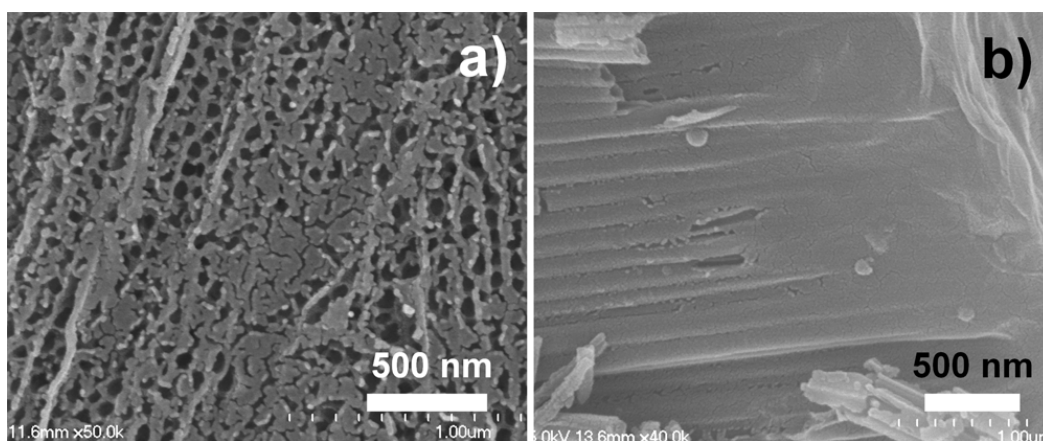

**Fig. S8** SEM images of RGO-TNTs electrode after the PEC degradation of MO dye under visible-light irradiation.
